# Supplementary material for: An RNA-binding compound that stabilizes the HIV-1 gRNA packaging signal structure and specifically blocks HIV-1 RNA encapsidation
Source: PubMed Central journal article supplement (PMC5853050; doi:10.1186/s12977-018-0407-4), 2018-03-14
Supplement: 12977_2018_407_MOESM2_ESM.pdf [file 12977_2018_407_MOESM2_ESM.pdf]

| nt number | WT RNA       | WT RNA PLUS NSC | DIFFERENCE UPON ADDITION OF NSC |
|-----------|--------------|-----------------|---------------------------------|
| 1         |              |                 |                                 |
| 2         |              |                 |                                 |
| 3         |              |                 |                                 |
| 4         |              |                 |                                 |
| 5         |              |                 |                                 |
| 6         |              |                 |                                 |
| 7         |              |                 |                                 |
| 8         |              |                 |                                 |
| 9         |              |                 |                                 |
| 10        |              |                 |                                 |
| 11        |              |                 |                                 |
| 12        |              |                 |                                 |
| 13        |              |                 |                                 |
| 14        |              |                 |                                 |
| 15        |              |                 |                                 |
| 16        |              |                 |                                 |
| 17        |              |                 |                                 |
| 18        |              |                 |                                 |
| 19        |              |                 |                                 |
| 20        | 0.043498865  | 0.032466468     | -0.0110324                      |
| 21        | 0.188494861  | 0.157422164     | -0.0310727                      |
| 22        | 0.903669812  | 0.794064403     | -0.10960541                     |
| 23        | 0.990048865  | 0.893584792     | -0.09646407                     |
| 24        | 0.769654879  | 0.684376108     | -0.08527877                     |
| 25        | 0.750201192  | 0.7539681       | 0.003766908                     |
| 26        | 0.338893376  | 0.381613173     | 0.042719797                     |
| 27        | 0.443615859  | 0.427121941     | -0.01649392                     |
| 28        | 0.265713195  | 0.264378975     | -0.00133422                     |
| 29        | 0.093805355  | 0.058592935     | -0.03521242                     |
| 30        | 0.531999291  | 0.44411665      | -0.08788264                     |
| 31        | 1.262919185  | 1.235107824     | -0.02781136                     |
| 32        | 1.990491063  | 1.770935808     | -0.21955525                     |
| 33        | 0.907250155  | 0.862612637     | -0.04463752                     |
| 34        | 1.06922438   | 0.994927204     | -0.07429718                     |
| 35        | 1.650342782  | 1.455134728     | -0.19520805                     |
| 36        | 0.282762287  | 0.307463598     | 0.024701311                     |
| 37        | 0.106108195  | 0.086616375     | -0.01949182                     |
| 38        | 0.169549122  | 0.174062353     | 0.004513231                     |
| 39        | 0.064742568  | -0.002123188    | -0.06686576                     |
| 40        | 0.160896668  | 0.094457748     | -0.06643892                     |
| 41        | 0.113376179  | 0.06696318      | -0.046413                       |
| 42        | 0.43075352   | 0.346638182     | -0.08411534                     |
| 43        | 0.313757198  | 0.257891122     | -0.05586608                     |
| 44        | 0.289707959  | 0.265172507     | -0.02453545                     |
| 45        | -0.004507997 | 0.003328779     | 0.007836776                     |
| 46        | 0.419931666  | 0.382088878     | -0.03784279                     |
| 47        | 0.58107028   | 0.57867868      | -0.0023916                      |
| 48        | 0.226338446  | 0.182598449     | -0.04374                        |

|    |             |             |             |
|----|-------------|-------------|-------------|
| 49 | 0.112984654 | 0.084717863 | -0.02826679 |
| 50 | 0.250706592 | 0.227449176 | -0.02325742 |
| 51 | 0.387447641 | 0.310150825 | -0.07729682 |
| 52 | 0.425405669 | 0.335745048 | -0.08966062 |
| 53 | 0.16340624  | 0.197810124 | 0.034403884 |
| 54 | 0.603430299 | 0.390236393 | -0.21319391 |
| 55 | 0.395551288 | 0.435794664 | 0.040243376 |
| 56 | 0.661270559 | 0.644997176 | -0.01627338 |
| 57 | 0.078755529 | 0.061005977 | -0.01774955 |
| 58 | 0.265187566 | 0.164857819 | -0.10032975 |
| 59 | 0.434308548 | 0.333159219 | -0.10114933 |
| 60 | 0.159044324 | 0.171825898 | 0.012781574 |
| 61 | 0.329162294 | 0.281690043 | -0.04747225 |
| 62 | 0.547564496 | 0.516788963 | -0.03077553 |
| 63 | 0.245889284 | 0.239919365 | -0.00596992 |
| 64 | 0.09268468  | 0.084262025 | -0.00842265 |
| 65 | 0.265203755 | 0.293619137 | 0.028415381 |
| 66 | 0.502447099 | 0.522355199 | 0.019908101 |
| 67 | 0.373993647 | 0.465786015 | 0.091792368 |
| 68 | 0.476964951 | 0.533632082 | 0.056667131 |
| 69 | 0.190824938 | 0.223738319 | 0.032913381 |
| 70 | 0.175076245 | 0.099285826 | -0.07579042 |
| 71 | 0.07396834  | 0.038273199 | -0.03569514 |
| 72 | 0.150007435 | 0.13798085  | -0.01202659 |
| 73 | 0.215277848 | 0.183124611 | -0.03215324 |
| 74 | 0.740132158 | 0.722578026 | -0.01755413 |
| 75 | 0.963754115 | 0.905810876 | -0.05794324 |
| 76 | 0.613415951 | 0.600251769 | -0.01316418 |
| 77 | 1.193761582 | 1.170213991 | -0.02354759 |
| 78 | 1.231192305 | 1.278131846 | 0.046939541 |
| 79 | 0.975685397 | 0.981864206 | 0.006178809 |
| 80 | 0.319335802 | 0.318815015 | -0.00052079 |
| 81 | 0.061571318 | 0.04153467  | -0.02003665 |
| 82 | 0.453633557 | 0.443447683 | -0.01018587 |
| 83 | 0.914617508 | 0.759638005 | -0.1549795  |
| 84 | 0.597357137 | 0.636116747 | 0.03875961  |
| 85 | 0.136919492 | 0.120428289 | -0.0164912  |
| 86 | 0.232793308 | 0.201334805 | -0.0314585  |
| 87 | 0.135518516 | 0.135403034 | -0.00011548 |
| 88 | 0.409024108 | 0.396531869 | -0.01249224 |
| 89 | 0.439207675 | 0.462705961 | 0.023498286 |
| 90 | 0.176354001 | 0.210343254 | 0.033989253 |
| 91 | 0.34609797  | 0.313702444 | -0.03239553 |
| 92 | 0.759379003 | 0.710690392 | -0.04868861 |
| 93 | 0.168221834 | 0.153590538 | -0.0146313  |
| 94 | 0.119597497 | 0.130817846 | 0.011220349 |
| 95 | 0.215509762 | 0.212806216 | -0.00270355 |
| 96 | 0.256130839 | 0.235357889 | -0.02077295 |
| 97 | 0.683468441 | 0.5981483   | -0.08532014 |

|     |             |             |             |
|-----|-------------|-------------|-------------|
| 98  | 0.660280805 | 0.60636645  | -0.05391436 |
| 99  | 0.121494355 | 0.117987907 | -0.00350645 |
| 100 | 0.241835932 | 0.246690888 | 0.004854956 |
| 101 | 0.285435372 | 0.313201043 | 0.02776567  |
| 102 | 0.414899614 | 0.43332263  | 0.018423016 |
| 103 | 0.359690232 | 0.36140062  | 0.001710388 |
| 104 | 0.279820928 | 0.238824464 | -0.04099646 |
| 105 | 0.648326106 | 0.59706973  | -0.05125638 |
| 106 | 0.413341753 | 0.399926994 | -0.01341476 |
| 107 | 0.753594187 | 0.743746707 | -0.00984748 |
| 108 | 0.781822506 | 0.692940469 | -0.08888204 |
| 109 | 0.216528271 | 0.199895577 | -0.01663269 |
| 110 | 0.213134375 | 0.117573485 | -0.09556089 |
| 111 | 0.091876528 | 0.063718609 | -0.02815792 |
| 112 | 0.251395275 | 0.160363979 | -0.0910313  |
| 113 | 0.219933943 | 0.232435978 | 0.012502036 |
| 114 | 0.311759608 | 0.320491445 | 0.008731837 |
| 115 | 0.232022244 | 0.186783419 | -0.04523882 |
| 116 | 0.244321532 | 0.212633657 | -0.03168788 |
| 117 | 0.250256878 | 0.176550131 | -0.07370675 |
| 118 | 0.397227295 | 0.402986102 | 0.005758808 |
| 119 | 1.056497077 | 1.02640288  | -0.0300942  |
| 120 | 0.19238057  | 0.162230741 | -0.03014983 |
| 121 | 0.755887922 | 0.747984872 | -0.00790305 |
| 122 | 0.043883525 | 0.072686663 | 0.028803137 |
| 123 | 0.55792659  | 0.541346633 | -0.01657996 |
| 124 | 0.408183677 | 0.415815543 | 0.007631866 |
| 125 | 0.367266766 | 0.405531707 | 0.038264941 |
| 126 | 0.176134751 | 0.162620379 | -0.01351437 |
| 127 | 0.047459059 | 0.056818461 | 0.009359402 |
| 128 | 0.266147154 | 0.198540257 | -0.0676069  |
| 129 | 0.216094855 | 0.22755014  | 0.011455284 |
| 130 | 0.408027544 | 0.34992556  | -0.05810198 |
| 131 | 0.017953648 | 0.026298799 | 0.008345151 |
| 132 | 0.575788104 | 0.556399194 | -0.01938891 |
| 133 | 0.932745028 | 0.933205256 | 0.000460228 |
| 134 | 0.485657141 | 0.486681795 | 0.001024653 |
| 135 | 0.208923049 | 0.192895693 | -0.01602736 |
| 136 | 0.257032552 | 0.26635225  | 0.009319698 |
| 137 | 0.387700608 | 0.422260601 | 0.03455992  |
| 138 | 0.45077136  | 0.369396646 | -0.08137471 |
| 139 | 0.046485529 | 0.044565698 | -0.00191983 |
| 140 | 0.26303988  | 0.287981325 | 0.024941445 |
| 141 | 0.327685936 | 0.351551902 | 0.023865966 |
| 142 | 0.552044306 | 0.614693009 | 0.062648703 |
| 143 | 0.324667065 | 0.260790807 | -0.06387626 |
| 144 | 0.242299831 | 0.184738915 | -0.05756092 |
| 145 | 0.028232574 | 0.015977323 | -0.01225525 |
| 146 | 0.314202094 | 0.286247831 | -0.02795426 |

|     |             |             |             |
|-----|-------------|-------------|-------------|
| 147 | 0.18167867  | 0.201592636 | 0.019913966 |
| 148 | 0.513554034 | 0.452840312 | -0.06071372 |
| 149 | 0.947850792 | 0.853577569 | -0.09427322 |
| 150 | 2.814488221 | 2.146073601 | -0.66841462 |
| 151 | 1.33662144  | 1.465885281 | 0.12926384  |
| 152 | 0.471976178 | 0.256209156 | -0.21576702 |
| 153 | 0.685398711 | 0.71385501  | 0.028456299 |
| 154 | 0.401778057 | 0.345956187 | -0.05582187 |
| 155 | 0.140483046 | 0.129133889 | -0.01134916 |
| 156 | 1.141916585 | 1.028620332 | -0.11329625 |
| 157 | 1.512981721 | 1.349758404 | -0.16322332 |
| 158 | 0.928508887 | 0.878367875 | -0.05014101 |
| 159 | 0.290148625 | 0.339279208 | 0.049130583 |
| 160 | 0.292072662 | 0.367569816 | 0.075497154 |
| 161 | 0.185018023 | 0.155174949 | -0.02984307 |
| 162 | 0.594873288 | 0.567203931 | -0.02766936 |
| 163 | 0.501752516 | 0.453190645 | -0.04856187 |
| 164 | 0.078210476 | 0.050235075 | -0.0279754  |
| 165 | 0.442523675 | 0.391110545 | -0.05141313 |
| 166 | 1.19494314  | 1.075000136 | -0.119943   |
| 167 | 0.785385128 | 0.736384172 | -0.04900096 |
| 168 | 0.23002879  | 0.190297284 | -0.03973151 |
| 169 | 1.092314817 | 0.940790781 | -0.15152404 |
| 170 | 0.082275785 | 0.064948978 | -0.01732681 |
| 171 | 1.099097095 | 1.006402453 | -0.09269464 |
| 172 | 0.465837605 | 0.45897774  | -0.00685986 |
| 173 | 0.426271488 | 0.421155649 | -0.00511584 |
| 174 | 0.078651732 | 0.025459599 | -0.05319213 |
| 175 | 0.152278921 | 0.13017111  | -0.02210781 |
| 176 | 0.216045888 | 0.157415881 | -0.05863001 |
| 177 | 0.421920671 | 0.345333325 | -0.07658735 |
| 178 | 0.315009523 | 0.30134742  | -0.0136621  |
| 179 | 0.393469009 | 0.475620099 | 0.08215109  |
| 180 | 0.804002899 | 0.626930192 | -0.17707271 |
| 181 | 1.146811264 | 1.067185182 | -0.07962608 |
| 182 | 0.283908283 | 0.323984607 | 0.040076324 |
| 183 | 0.525855491 | 0.556276926 | 0.030421435 |
| 184 | 0.425497617 | 0.493744971 | 0.068247354 |
| 185 | 1.1030333   | 0.92795156  | -0.17508174 |
| 186 | 0.137472035 | 0.08455051  | -0.05292153 |
| 187 | 0.349956083 | 0.271753844 | -0.07820224 |
| 188 | 0.299309049 | 0.169240799 | -0.13006825 |
| 189 | 0.890447404 | 0.682811625 | -0.20763578 |
| 190 | 0.475065905 | 0.447023685 | -0.02804222 |
| 191 | 0.735065687 | 0.800006335 | 0.064940649 |
| 192 | 1.15313423  | 1.093163415 | -0.05997081 |
| 193 | 0.91837206  | 0.920880763 | 0.002508703 |
| 194 | 0.399513637 | 0.450446791 | 0.050933154 |
| 195 | 0.627472242 | 0.609563344 | -0.0179089  |

|     |             |             |             |
|-----|-------------|-------------|-------------|
| 196 | 0.121528668 | 0.206024724 | 0.084496057 |
| 197 | 1.267121127 | 0.340627103 | -0.92649402 |
| 198 | 0.609133213 | 0.281209805 | -0.32792341 |
| 199 | 0.387330496 | 0.39603211  | 0.008701615 |
| 200 | 0.218995549 | 0.237908281 | 0.018912732 |
| 201 | 0.867368192 | 0.773249234 | -0.09411896 |
| 202 | 1.30937951  | 1.253371934 | -0.05600758 |
| 203 | 0.792985544 | 0.754108146 | -0.0388774  |
| 204 | 0.441177619 | 0.488146262 | 0.046968643 |
| 205 | 0.710922813 | 0.71019796  | -0.00072485 |
| 206 | 0.895097218 | 0.862623238 | -0.03247398 |
| 207 | 0.596726482 | 0.577464426 | -0.01926206 |
| 208 | 0.583458038 | 0.568138256 | -0.01531978 |
| 209 | 0.14422147  | 0.175036305 | 0.030814835 |
| 210 | 0.736017851 | 0.62897251  | -0.10704534 |
| 211 | 0.68530071  | 0.584639376 | -0.10066133 |
| 212 | 0.589968727 | 0.587782819 | -0.00218591 |
| 213 | 0.625570311 | 0.629852649 | 0.004282338 |
| 214 | 0.286230981 | 0.359503958 | 0.073272977 |
| 215 | 0.395604278 | 0.370242039 | -0.02536224 |
| 216 | 0.747997476 | 0.742371899 | -0.00562558 |
| 217 | 0.863968379 | 0.793492647 | -0.07047573 |
| 218 | 0.352532427 | 0.322673332 | -0.02985909 |
| 219 | 0.150607583 | 0.140174506 | -0.01043308 |
| 220 | 0.213724167 | 0.160726297 | -0.05299787 |
| 221 | 0.329771865 | 0.323433627 | -0.00633824 |
| 222 | 0.126126717 | 0.072484333 | -0.05364238 |
| 223 | 0.296647578 | 0.269736851 | -0.02691073 |
| 224 | 0.306986387 | 0.337883605 | 0.030897218 |
| 225 | 0.663314849 | 0.60647821  | -0.05683664 |
| 226 | 0.409588532 | 0.500623827 | 0.091035295 |
| 227 | 0.419391128 | 0.426545627 | 0.007154499 |
| 228 | 0.055837373 | 0.059335383 | 0.00349801  |
| 229 | 0.208428956 | 0.176631923 | -0.03179703 |
| 230 | 0.040588469 | 0.030373887 | -0.01021458 |
| 231 | 0.255916878 | 0.265949748 | 0.01003287  |
| 232 | 0.308508357 | 0.280314202 | -0.02819416 |
| 233 | 0.046227048 | 0.051285347 | 0.005058298 |
| 234 | 0.258092927 | 0.268077877 | 0.009984951 |
| 235 | 0.262242342 | 0.289622283 | 0.027379941 |
| 236 | 0.500249856 | 0.524901681 | 0.024651825 |
| 237 | 0.288949661 | 0.284071914 | -0.00487775 |
| 238 | 0.078389749 | 0.117418491 | 0.039028743 |
| 239 | 0.916827779 | 1.153448545 | 0.236620766 |
| 240 | 0.439743334 | 0.557131714 | 0.11738838  |
| 241 | 2.01241385  | 1.763042373 | -0.24937148 |
| 242 | 0.976738369 | 0.805135187 | -0.17160318 |
| 243 | 0.653378909 | 0.631167653 | -0.02221126 |
| 244 | 0.292452947 | 0.296460725 | 0.004007778 |

|     |             |             |             |
|-----|-------------|-------------|-------------|
| 245 | 0.091991576 | 0.067511096 | -0.02448048 |
| 246 | 0.353157607 | 0.39967791  | 0.046520303 |
| 247 | 0.172044721 | 0.158708495 | -0.01333623 |
| 248 | 0.652599568 | 0.616777202 | -0.03582237 |
| 249 | 0.111555378 | 0.087017786 | -0.02453759 |
| 250 | 0.40335708  | 0.477883434 | 0.074526353 |
| 251 | 0.262873173 | 0.131960221 | -0.13091295 |
| 252 | 0.218120514 | 0.118636721 | -0.09948379 |
| 253 | 0.248116249 | 0.156498836 | -0.09161741 |
| 254 | 0.294791705 | 0.330853762 | 0.036062057 |
| 255 | 0.773597125 | 0.665108482 | -0.10848864 |
| 256 | 1.162850884 | 1.114963312 | -0.04788757 |
| 257 | 0.697642506 | 0.328700263 | -0.36894224 |
| 258 | 0.108683411 | 0.094620666 | -0.01406275 |
| 259 | 0.234467689 | 0.149041066 | -0.08542662 |
| 260 | 0.132956715 | 0.086768212 | -0.0461885  |
| 261 | 0.13293778  | 0.075520121 | -0.05741766 |
| 262 | 0.119751948 | 0.108464175 | -0.01128777 |
| 263 | 0.164228518 | 0.179130487 | 0.014901969 |
| 264 | 0.218476313 | 0.222035728 | 0.003559415 |
| 265 | 0.226409788 | 0.192322471 | -0.03408732 |
| 266 | 0.21277393  | 0.227392755 | 0.014618826 |
| 267 | 0.139052295 | 0.153113278 | 0.014060983 |
| 268 | 0.191308127 | 0.16336357  | -0.02794456 |
| 269 | 0.299198353 | 0.255360677 | -0.04383768 |
| 270 | 0.164992063 | 0.150087465 | -0.0149046  |
| 271 | 0.473647153 | 0.422507261 | -0.05113989 |
| 272 | 0.857197697 | 0.838117811 | -0.01907989 |
| 273 | 1.130828234 | 0.920890655 | -0.20993758 |
| 274 | 0.526584567 | 0.342500886 | -0.18408368 |
| 275 | 0.200280566 | 0.191613588 | -0.00866698 |
| 276 | 0.267390766 | 0.223072333 | -0.04431843 |
| 277 | 0.2163677   | 0.199745206 | -0.01662249 |
| 278 | 0.166168605 | 0.142242026 | -0.02392658 |
| 279 | 0.597981449 | 0.458591641 | -0.13938981 |
| 280 | 0.523405267 | 0.283079941 | -0.24032533 |
| 281 | 0.285492629 | 0.259251887 | -0.02624074 |
| 282 | 0.452566806 | 0.365591993 | -0.08697481 |
| 283 | 0.214863906 | 0.224137945 | 0.00927404  |
| 284 | 0.262535315 | 0.285328792 | 0.022793477 |
| 285 | 0.357583682 | 0.334716448 | -0.02286723 |
| 286 | 0.360407791 | 0.341637674 | -0.01877012 |
| 287 | 0.125317228 | 0.164318721 | 0.039001492 |
| 288 | 0.340970122 | 0.326559078 | -0.01441104 |
| 289 | 0.356384672 | 0.34921814  | -0.00716653 |
| 290 | 0.304480601 | 0.261561712 | -0.04291889 |
| 291 | 0.636885336 | 0.720865222 | 0.083979886 |
| 292 | 1.3748708   | 1.267567786 | -0.10730301 |
| 293 | 0.386949114 | 0.256050029 | -0.13089908 |

|     |             |             |             |
|-----|-------------|-------------|-------------|
| 294 | 0.633974865 | 0.554549932 | -0.07942493 |
| 295 | 0.612347699 | 0.514126602 | -0.0982211  |
| 296 | 0.637753885 | 0.588044715 | -0.04970917 |
| 297 | 0.339890317 | 0.26323359  | -0.07665673 |
| 298 | 0.55011987  | 0.388488682 | -0.16163119 |
| 299 | 0.222338509 | 0.343342205 | 0.121003696 |
| 300 | 0.349690396 | 0.557266406 | 0.207576011 |
| 301 | 0.404141708 | 0.367338281 | -0.03680343 |
| 302 | 0.192787329 | 0.180715831 | -0.0120715  |
| 303 | 0.436352715 | 0.45094491  | 0.014592194 |
| 304 | 0.994519125 | 0.914284928 | -0.0802342  |
| 305 | 0.979601304 | 1.001888144 | 0.02228684  |
| 306 | 0.231291757 | 0.208517412 | -0.02277434 |
| 307 | 0.266241153 | 0.235952975 | -0.03028818 |
| 308 | 0.229488173 | 0.203897059 | -0.02559111 |
| 309 | 0.734284935 | 0.72907247  | -0.00521246 |
| 310 | 0.555379952 | 0.568310109 | 0.012930157 |
| 311 | 0.540547187 | 0.533183443 | -0.00736374 |
| 312 | 0.142976023 | 0.096311232 | -0.04666479 |
| 313 | 0.24483658  | 0.201391915 | -0.04344467 |
| 314 | 0.252400936 | 0.252701396 | 0.00030046  |
| 315 | 0.200829033 | 0.17202061  | -0.02880842 |
| 316 | 0.074204475 | 0.095107257 | 0.020902783 |
| 317 | 0.318710558 | 0.326955693 | 0.008245135 |
| 318 | 0.489749333 | 0.529568953 | 0.039819621 |
| 319 | 1.6528877   | 1.523378481 | -0.12950922 |
| 320 | 2.331341248 | 1.960478909 | -0.37086234 |
| 321 | 1.192524968 | 1.047337476 | -0.14518749 |
| 322 | 1.036817057 | 1.070448205 | 0.033631148 |
| 323 | 0.889070172 | 0.781750467 | -0.10731971 |
| 324 | 0.881610545 | 0.546248709 | -0.33536184 |
| 325 | 0.43428925  | 0.350070165 | -0.08421909 |
| 326 | 0.774988685 | 0.588440418 | -0.18654827 |
| 327 | 0.491554335 | 0.403964633 | -0.0875897  |
| 328 | 0.337598042 | 0.245618178 | -0.09197986 |
| 329 | 0.214367953 | 0.201130383 | -0.01323757 |
| 330 | 0.143759649 | 0.160308638 | 0.01654899  |
| 331 | 0.107258994 | 0.115482741 | 0.008223747 |
| 332 | 0.494776988 | 0.362296513 | -0.13248048 |
| 333 | 0.40367394  | 0.364734602 | -0.03893934 |
| 334 | 0.407488042 | 0.332794535 | -0.07469351 |
| 335 | 0.823326464 | 0.685476619 | -0.13784985 |
| 336 | 0.591999993 | 0.476668421 | -0.11533157 |
| 337 | 0.833052402 | 0.706960296 | -0.12609211 |
| 338 | 1.00258393  | 0.921556854 | -0.08102708 |
| 339 | 0.333950149 | 0.411830357 | 0.077880207 |
| 340 | 0.391097666 | 0.453128666 | 0.062031    |
| 341 | 0.325530026 | 0.362932381 | 0.037402355 |
| 342 | 0.087697289 | 0.08716162  | -0.00053567 |

|     |             |             |             |
|-----|-------------|-------------|-------------|
| 343 | 0.288281275 | 0.349632115 | 0.06135084  |
| 344 | 0.498405976 | 0.485713238 | -0.01269274 |
| 345 | 0.215728131 | 0.161100112 | -0.05462802 |
| 346 | 0.36966243  | 0.379750125 | 0.010087695 |
| 347 | 1.215569411 | 1.120877744 | -0.09469167 |
| 348 | 0.078467482 | 0.062653191 | -0.01581429 |
| 349 | 0.323391763 | 0.181544756 | -0.14184701 |
| 350 | 0.049327952 | 0.024421703 | -0.02490625 |
| 351 | 0.24360084  | 0.222505517 | -0.02109532 |
| 352 | 1.273443239 | 2.302687122 | 1.029243884 |
| 353 | 0.502150182 | 0.588685013 | 0.086534831 |
| 354 | 0.508266853 | 1.681696841 | 1.173429988 |
| 355 | 1.09950209  | 1.578099545 | 0.478597455 |
| 356 | 0.272973672 |             |             |

| nt number | $\Delta p1$ RNA | $\Delta p1$ RNA plus NSC |
|-----------|-----------------|--------------------------|
| 1         |                 |                          |
| 2         |                 |                          |
| 3         |                 |                          |
| 4         |                 |                          |
| 5         |                 |                          |
| 6         |                 |                          |
| 7         |                 |                          |
| 8         |                 |                          |
| 9         |                 |                          |
| 10        |                 |                          |
| 11        |                 |                          |
| 12        |                 |                          |
| 13        |                 |                          |
| 14        |                 |                          |
| 15        |                 |                          |
| 16        |                 |                          |
| 17        |                 |                          |
| 18        |                 |                          |
| 19        |                 |                          |
| 20        | -0.08360075     | 0.303679229              |
| 21        | 0.371424331     | 0.96639656               |
| 22        | 1.017567327     | 1.471641697              |
| 23        | 0.810408738     | 1.391498414              |
| 24        | 0.34168009      | 1.007722764              |
| 25        | -0.30416343     | 0.569291436              |
| 26        | -0.01995385     | 0.230397202              |
| 27        | -0.30884158     | 0.126037422              |
| 28        | -0.15183809     | 0.09882933               |
| 29        | 0.286025063     | 0.251559754              |
| 30        | 2.194820985     | 1.836828522              |
| 31        | 2.215979752     | 2.753503384              |
| 32        | 1.860864655     | 2.81548387               |
| 33        | 0.414948681     | 1.446713208              |
| 34        | 2.18980636      | 2.934094419              |
| 35        | -0.4423584      | 0.16875769               |
| 36        | -0.15884636     | 0.177888115              |
| 37        | -0.04475966     | 0.056861155              |
| 38        | 0.132004122     | 0.076706939              |
| 39        | -0.81783988     | -0.45750731              |
| 40        | -0.10305115     | -0.1443997               |
| 41        | -0.42947481     | -0.06672733              |
| 42        | -0.89441488     | 0.138148108              |
| 43        | -0.4009147      | -0.24263885              |
| 44        | -0.12868081     | -0.28197204              |
| 45        | -0.07269735     | -0.13722395              |
| 46        | -0.13071083     | 0.170478007              |
| 47        | -0.43889        | 0.063475287              |
| 48        | -0.50533227     | -0.16734434              |

|    |             |             |
|----|-------------|-------------|
| 49 | -0.26426546 | -0.10796094 |
| 50 | -0.37008299 | 0.453654357 |
| 51 | -0.35229682 | -0.4169402  |
| 52 | 0.162326529 | 0.402205849 |
| 53 | -0.83092363 | -0.78631227 |
| 54 | 0.004754079 | -0.11692856 |
| 55 | 0.265056369 | -0.34494177 |
| 56 | -0.03638788 | 0.10659223  |
| 57 | 0.055118806 | -0.34836061 |
| 58 | 0.028439774 | -0.46872523 |
| 59 | 0.175230847 | 0.045988251 |
| 60 | -0.19692639 | -0.39724646 |
| 61 | -0.14630104 | -0.573089   |
| 62 | -0.26805705 | 0.333432572 |
| 63 | -0.45852851 | -0.33554542 |
| 64 | -0.48000471 | -0.59894411 |
| 65 | -0.27472789 | -0.37790812 |
| 66 | -0.22102249 | -0.18354432 |
| 67 | -0.06429255 | -0.02363804 |
| 68 | 0.328969251 | 0.249360841 |
| 69 | -0.09405389 | -0.03658189 |
| 70 | -0.06237547 | -0.18126954 |
| 71 | -0.18413976 | -0.55176684 |
| 72 | -0.56010968 | -0.73928835 |
| 73 | -0.08107272 | -0.23051327 |
| 74 | 0.398398396 | 0.390168779 |
| 75 | 1.331336813 | 0.886968166 |
| 76 | 1.590132257 | 1.761975138 |
| 77 | 1.377816658 | 1.24977208  |
| 78 | 0.848090736 | 0.7930813   |
| 79 | -0.2133501  | 0.38271963  |
| 80 | -0.07837959 | -0.07548468 |
| 81 | 0.022494204 | -0.02235925 |
| 82 | -0.02607944 | -0.00169406 |
| 83 | 0.737120928 | 0.2604949   |
| 84 | -0.04837337 | -0.12876018 |
| 85 | -0.28930232 | -0.42120848 |
| 86 | -0.15873759 | -0.38854788 |
| 87 | -0.45087025 | -0.50729721 |
| 88 | -0.33848287 | -0.16626964 |
| 89 | -0.25608792 | -0.2281807  |
| 90 | 0.039769964 | -0.1072693  |
| 91 | 0.649669473 | 0.680035779 |
| 92 | -0.22482564 | -0.23289538 |
| 93 | -0.2131029  | -0.13647221 |
| 94 | -0.13198938 | -0.17868426 |
| 95 | 0.10583533  | -0.11954104 |
| 96 | -0.34128819 | -0.44972084 |
| 97 | -0.64594038 | -0.32128225 |

|     |             |             |
|-----|-------------|-------------|
| 98  | 0.051327802 | -0.18863795 |
| 99  | -0.15385607 | -0.33657066 |
| 100 | -0.29136958 | -0.31982949 |
| 101 | -0.10152201 | -0.32131855 |
| 102 | 0.09182876  | 0.047620453 |
| 103 | -0.04830973 | -0.13572376 |
| 104 | 0.299892551 | 0.193603393 |
| 105 | 0.251963153 | 0.167838025 |
| 106 | -0.05017129 | 0.18690911  |
| 107 | 0.142934777 | -0.0742543  |
| 108 | 0.181290399 | -0.20297099 |
| 109 | -0.30122409 | -0.3597402  |
| 110 | -0.31720344 | -0.23111443 |
| 111 | -0.45021125 | -0.53001321 |
| 112 | -0.05121277 | -0.02231294 |
| 113 | -0.05318428 | -0.23538815 |
| 114 | -0.38525413 | -0.30891273 |
| 115 | -0.27257051 | -0.23387478 |
| 116 | 0.093271577 | 0.043417982 |
| 117 | 0.438759341 | 0.513227854 |
| 118 | 0.654544869 | 0.727650744 |
| 119 | 0.195626045 | 0.182108227 |
| 120 | 0.012044392 | 0.029689725 |
| 121 | -0.25426257 | -0.07994443 |
| 122 | -0.13354914 | -0.14489394 |
| 123 | 0.115917887 | 0.152132799 |
| 124 | 0.127297981 | 0.095790949 |
| 125 | -0.16081859 | -0.13833657 |
| 126 | -0.22230682 | -0.2583131  |
| 127 | -0.37780346 | -0.70485271 |
| 128 | -0.26804752 | -0.4911522  |
| 129 | -0.30981814 | -0.36108164 |
| 130 | -0.05291455 | -0.39150361 |
| 131 | 0.043285516 | -0.30592343 |
| 132 | 0.385294672 | 0.299164972 |
| 133 | 0.309877892 | 0.109573706 |
| 134 | -0.41344481 | -0.53258825 |
| 135 | -0.33347615 | -0.67942119 |
| 136 | -0.02703683 | -0.74682177 |
| 137 | -0.51566075 | -0.76721346 |
| 138 | -0.25249206 | -0.68967053 |
| 139 | -0.20687263 | -0.09120864 |
| 140 | 0.132884806 | 0.069874504 |
| 141 | -0.13800438 | -0.58780702 |
| 142 | -0.05965592 | -0.19558422 |
| 143 | -0.1161487  | -0.05871386 |
| 144 | -0.17684767 | -0.1762856  |
| 145 | -0.2410771  | -0.62964441 |
| 146 | -0.5144429  | -0.5435453  |

|     |             |             |
|-----|-------------|-------------|
| 147 | -0.0364687  | -0.25819211 |
| 148 | 0.164847125 | 0.03598144  |
| 149 | 0.126380454 | -0.15116194 |
| 150 | -0.10240372 | -0.2435411  |
| 151 | 0.00419292  | -0.12091614 |
| 152 | 0.061597814 | 0.054240715 |
| 153 | 0.613695712 | 0.597321318 |
| 154 | 0.679483251 | 0.325895912 |
| 155 | 0.716136497 | 0.419950183 |
| 156 | 1.10223417  | 0.581727745 |
| 157 | 0.470713151 | 0.352960983 |
| 158 | 0.047350431 | -0.08992483 |
| 159 | -0.21831792 | -0.42171615 |
| 160 | -0.55307589 | -0.80233753 |
| 161 | -0.16936432 | -0.29218375 |
| 162 | -0.12237566 | -0.19501054 |
| 163 | -0.14982667 | -0.573822   |
| 164 | -0.5813238  | -0.68319293 |
| 165 | 0.578993741 | 0.350669958 |
| 166 | 0.001052561 | -0.27535077 |
| 167 | 0.072191989 | -0.55886977 |
| 168 | 0.808606445 | 0.698941151 |
| 169 | 0.764459225 | 0.342534364 |
| 170 | 1.24264929  | 1.297940721 |
| 171 | 0.434806862 | 0.462632483 |
| 172 | 0.005746471 | 0.041214558 |
| 173 | -0.20765338 | -0.22114176 |
| 174 | -0.2765775  | -0.2996647  |
| 175 | -0.50868401 | -0.33981547 |
| 176 | -0.45616531 | -0.35177315 |
| 177 | -0.07869779 | -0.14952664 |
| 178 | -0.45427615 | -0.2476213  |
| 179 | -1.73044383 | -2.42565527 |
| 180 | -0.27764565 | -0.56607083 |
| 181 | 0.037911549 | -0.41370357 |
| 182 | 0.073937167 | -0.03811518 |
| 183 | -1.26054289 | -0.62231848 |
| 184 | 1.672647696 | 1.621836622 |
| 185 | 0.114483687 | 0.177680991 |
| 186 | 0.18117422  | 0.026684104 |
| 187 | -0.23877986 | -0.23126468 |
| 188 | -0.44383622 | -0.44094563 |
| 189 | -0.3417421  | -0.60818531 |
| 190 | 0.34794932  | 0.331513606 |
| 191 | 1.441019863 | 1.442513349 |
| 192 | 0.576688035 | 0.639812756 |
| 193 | 0.085911008 | 0.20413689  |
| 194 | -0.13729364 | -0.05190814 |
| 195 | -0.21645864 | -0.43396547 |

|     |             |             |
|-----|-------------|-------------|
| 196 | -0.18185281 | -0.26216763 |
| 197 | -0.04255695 | -0.3097539  |
| 198 | 0.078477677 | -0.05610848 |
| 199 | -0.15578487 | -0.293204   |
| 200 | 0.362563049 | 0.21956737  |
| 201 | 0.655168479 | 0.383940927 |
| 202 | 0.636738296 | 0.580537456 |
| 203 | 0.71968146  | 0.688595964 |
| 204 | 0.4257013   | 0.554818274 |
| 205 | 0.447990219 | 0.570924045 |
| 206 | -0.27995875 | -0.14787633 |
| 207 | -0.59656524 | -0.35342587 |
| 208 | 0.211382206 | -0.03576824 |
| 209 | 0.353343403 | 0.246738728 |
| 210 | 0.352064679 | 0.21816201  |
| 211 | 0.133677556 | 0.08493713  |
| 212 | 0.200858083 | -0.00049282 |
| 213 | 0.116669213 | -0.75659181 |
| 214 | 0.075395835 | -0.02605714 |
| 215 | 0.506406292 | 0.444265628 |
| 216 | 0.947851655 | 1.089097403 |
| 217 | 0.277230499 | 0.26353862  |
| 218 | -0.15601546 | -0.35426676 |
| 219 | -0.43371295 | -0.6608417  |
| 220 | -0.12244193 | -0.37279513 |
| 221 | -0.06416701 | -0.42332446 |
| 222 | 0.047476642 | -0.40736989 |
| 223 | 0.706093219 | -0.49400762 |
| 224 | 0.03370155  | -0.19280492 |
| 225 | 0.509965883 | 0.572261632 |
| 226 | 0.366155859 | -0.18185907 |
| 227 | -0.08314188 | -0.18641896 |
| 228 | -0.05213096 | -0.08001868 |
| 229 | -0.2022043  | -0.02519411 |
| 230 | -0.07172596 | 0.111404049 |
| 231 | -0.3627693  | -0.31701603 |
| 232 | -0.25766741 | -0.2618578  |
| 233 | -0.35972648 | -0.42669789 |
| 234 | 0.082513716 | 0.272452567 |
| 235 | 0.356731152 | 0.300551358 |
| 236 | -0.14062371 | -0.16339403 |
| 237 | -0.29462903 | -0.10694092 |
| 238 | -1.88695705 | -1.38922549 |
| 239 | 0.44474826  | 0.195711508 |
| 240 | 2.174752967 | 2.375744479 |
| 241 | 1.442658414 | 1.690722938 |
| 242 | 0.71959906  | 0.706716486 |
| 243 | -0.22807848 | -0.41307272 |
| 244 | -0.15565987 | -0.42429669 |

|     |             |             |
|-----|-------------|-------------|
| 245 | -0.24217973 | -0.7321558  |
| 246 | -0.54921787 | -0.46480563 |
| 247 | 1.091794191 | 1.382170797 |
| 248 | -0.45279823 | -0.40821287 |
| 249 | -0.70674269 | -0.72400505 |
| 250 | -0.72832116 | -1.07947183 |
| 251 | 0.027806546 | 0.030905294 |
| 252 | -0.38542007 | -0.52064184 |
| 253 | -0.31973197 | -0.31879855 |
| 254 | -0.09088499 | -0.21868354 |
| 255 | 0.49703153  | 0.437244472 |
| 256 | 1.736757376 | 2.187857246 |
| 257 | -0.46634467 | -0.41455818 |
| 258 | -0.04675007 | -0.1512673  |
| 259 | -0.29266193 | -0.38761586 |
| 260 | -0.0905796  | -0.24526946 |
| 261 | 0.102593532 | -0.00543268 |
| 262 | -0.33803918 | -0.43731858 |
| 263 | -0.14000756 | -0.32499546 |
| 264 | -0.42306127 | -0.57785646 |
| 265 | -0.2211777  | -0.20035433 |
| 266 | -0.32797613 | -0.36360618 |
| 267 | -0.95487379 | -0.77632142 |
| 268 | -0.33639645 | -0.48017212 |
| 269 | -0.15075217 | -0.16394369 |
| 270 | -0.25888947 | -0.06601708 |
| 271 | 0.340675415 | 0.173476106 |
| 272 | -0.19711815 | -0.02113201 |
| 273 | 1.592359568 | 2.03731172  |
| 274 | -0.33280282 | -0.46682978 |
| 275 | -0.19130799 | -0.28010036 |
| 276 | -0.22162109 | -0.16361738 |
| 277 | 0.156756642 | 0.142343219 |
| 278 | -0.39503429 | -0.2452399  |
| 279 | -0.10601335 | -0.01501704 |
| 280 | 0.929321411 | 0.69183689  |
| 281 | -0.15874025 | 0.032739825 |
| 282 | -0.45882847 | -0.35029225 |
| 283 | -0.04409818 | 0.109697115 |
| 284 | -0.40734972 | -0.52120268 |
| 285 | 0.181120768 | -0.18572111 |
| 286 | 0.056831752 | -0.11530686 |
| 287 | -0.1034458  | -0.12737609 |
| 288 | -0.03499416 | 0.142047685 |
| 289 | -0.59810704 | -0.85209862 |
| 290 | 1.436580295 | 2.042309091 |
| 291 | 0.869172896 | 1.165919997 |
| 292 | 0.461454505 | 1.008088658 |
| 293 | 0.619701322 | -0.0222044  |

|     |             |             |
|-----|-------------|-------------|
| 294 | 0.306797506 | -0.40817362 |
| 295 | 0.489022771 | 0.882350236 |
| 296 | 1.082330726 | 1.565346966 |
| 297 | -0.20597746 | -0.02614104 |
| 298 | 0.238330959 | 0.336803164 |
| 299 | -0.21191393 | -0.2070156  |
| 300 | -0.36335651 | -1.15257912 |
| 301 | -0.10044401 | -1.08228236 |
| 302 | 1.14106728  | 0.782032949 |
| 303 | -0.21651475 | -0.25690702 |
| 304 | -0.01293938 | 0.581604436 |
| 305 | 0.88714909  | 0.801028352 |
| 306 | 0.335833876 | 0.363866661 |
| 307 | 0.398222942 | 0.813503415 |
| 308 | 0.575981586 | 0.661281916 |
| 309 | 0.417040108 | 0.372626227 |
| 310 | -0.01893249 | -0.86042635 |
| 311 | -0.49647162 | -0.77551645 |
| 312 | -0.1561927  | 0.046420427 |
| 313 | 0.393025111 | 0.462591162 |
| 314 | -0.013182   | 0.05777717  |
| 315 | 0.241359997 | -0.08116665 |
| 316 | -0.41336527 | 0.074127047 |
| 317 | 0.377739169 | -0.03440924 |
| 318 | 0.267867171 | -0.1200703  |
| 319 | 0.10185529  | 0.418470121 |
| 320 | -0.1997564  | 0.046391619 |
| 321 | 0.24979876  | -0.04815622 |
| 322 | 0.328902385 | -0.0106544  |
| 323 | -0.19238682 | 0.068491235 |
| 324 | -0.1502415  | -0.84357131 |
| 325 | 0.248903418 | 0.327922351 |
| 326 | 0.861038107 | 0.60613896  |
| 327 | 0.363329587 | 0.321267771 |
| 328 | 0.917878718 | 0.436441275 |
| 329 | 0.066946462 | -0.57003801 |
| 330 | 0.30396811  | 0.448477279 |
| 331 | 0.344431845 | 0.62970429  |
| 332 | 0.02203193  | 0.139808398 |
| 333 | -0.13929535 | 0.486316226 |
| 334 | 0.343472866 | 1.450316639 |
| 335 | 1.017602908 | 4.675572182 |
| 336 |             | 0.540536446 |
| 337 |             | 6.787912744 |
